# Supplementary material for: Proteoglycan Combined with Hyaluronic Acid and Hydrolyzed Collagen Restores the Skin Barrier in Mild Atopic Dermatitis and Dry, Eczema-Prone Skin: A Pilot Study
Source: MDPI journal article supplement (doi:10.3390/ijms221910189), 2021-09-22
Supplement: s1 [file s1]

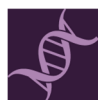

Supplementary Materials

# Proteoglycan combined with hyaluronic acid and hydrolyzed collagen restores skin barrier in mild atopic dermatitis and dry, eczema-prone skin

Young In Lee <sup>1,2,†</sup>, Sang Gyu Lee <sup>1,†</sup>, Jemin Kim <sup>1,2</sup>, Sooyeon Choi <sup>1</sup>, Inhee Jung <sup>3</sup> and Ju Hee Lee <sup>1,2,\*</sup>

<sup>1</sup> Department of Dermatology & Cutaneous Biology Research Institute, Yonsei University College of Medicine, Seoul, Korea; ylee1124@yuhs.ac (Y.I.L.); dltkdrb5658@yuhs.ac (S.G.L.); JEMIN89ZZ@yuhs.ac (J.K.); CHOISY429@yuhs.ac (S.C.)

<sup>2</sup> Scar Laser and Plastic Surgery Center, Yonsei Cancer Hospital, Seoul, Korea

<sup>3</sup> Global Medical Research Center, Seoul, Korea; injung@gmrc.co.kr

\* Correspondence: juhee@yuhs.ac; Tel.: +82-2-2228-2080

## 1. Supplementary Table

Table S1. Patient demographics.

| Screening No. | Sex | Age | Diagnosis               | Measurment Lesions   | XAS (xerosis assessment scale) <sup>1</sup> |
|---------------|-----|-----|-------------------------|----------------------|---------------------------------------------|
| S01           | F   | 22  | Atopic dermatitis, mild | Lt.antecubital fossa | N/A                                         |
| S02           | F   | 56  | Xerosis cutis           | Lt.upper arm         | 2                                           |
| S03           | F   | 40  | Xerosis cutis           | Rt.lower leg         | 2                                           |
| S04           | F   | 51  | Xerosis cutis           | Rt.lower arm         | 5                                           |
| S05           | F   | 43  | Xerosis cutis           | Rt.lower leg         | 2                                           |
| S06           | F   | 40  | Xerosis cutis           | Rt. Hand             | 3                                           |
| S07           | F   | 52  | Atopic dermatitis, mild | posterior neck       | N/A                                         |
| S08           | F   | 46  | Xerosis cutis           | Rt. Hand             | 2                                           |
| S09           | F   | 33  | Xerosis cutis           | Rt. Hand             | 2                                           |
| S10           | F   | 51  | Xerosis cutis           | Rt.lower leg         | 4                                           |
| S11           | F   | 22  | Xerosis cutis           | Lt. Hand             | 2                                           |
| S12           | M   | 23  | Atopic dermatitis, mild | Lt.antecubital fossa | N/A                                         |
| S13           | F   | 41  | Atopic dermatitis, mild | Lt.upper arm         | N/A                                         |
| S14           | F   | 45  | Xerosis cutis           | Rt.lower leg         | 4                                           |
| S15           | F   | 56  | Xerosis cutis           | Rt. Hand             | 3                                           |
| S16           | F   | 47  | Xerosis cutis           | Rt.lower leg         | 4                                           |
| S17           | F   | 39  | Xerosis cutis           | Rt.lower leg         | 5                                           |
| S18           | F   | 48  | Xerosis cutis           | Rt.lower arm         | 2                                           |
| S19           | M   | 47  | Atopic dermatitis, mild | Lt.lower leg         | N/A                                         |
| S20           | F   | 48  | Xerosis cutis           | Lt.lower leg         | 2                                           |
| S21           | F   | 20  | Atopic dermatitis, mild | Rt.antecubital fossa | N/A                                         |

|     |   |    |               |                |   |
|-----|---|----|---------------|----------------|---|
| S22 | M | 56 | Xerosis cutis | Lt. foot       | 2 |
| S23 | M | 38 | Xerosis cutis | posterior neck | 2 |
| S24 | F | 28 | Xerosis cutis | Rt.lower leg   | 5 |
| S25 | F | 26 | Xerosis cutis | Rt.lower arm   | 2 |

<sup>1</sup> XAS 0: absence of xerosis; 1: a few minute flakes, 2: many undifferentiated skin flakes, 3: some polygonal scales; 4: a moderate number of polygonal scales; 5: a large number of polygonal scale; 6: fissuring between scales; 7: moderate deep fissuring between scales; 8: deep fissuring.

## 2. Supplementary Figure

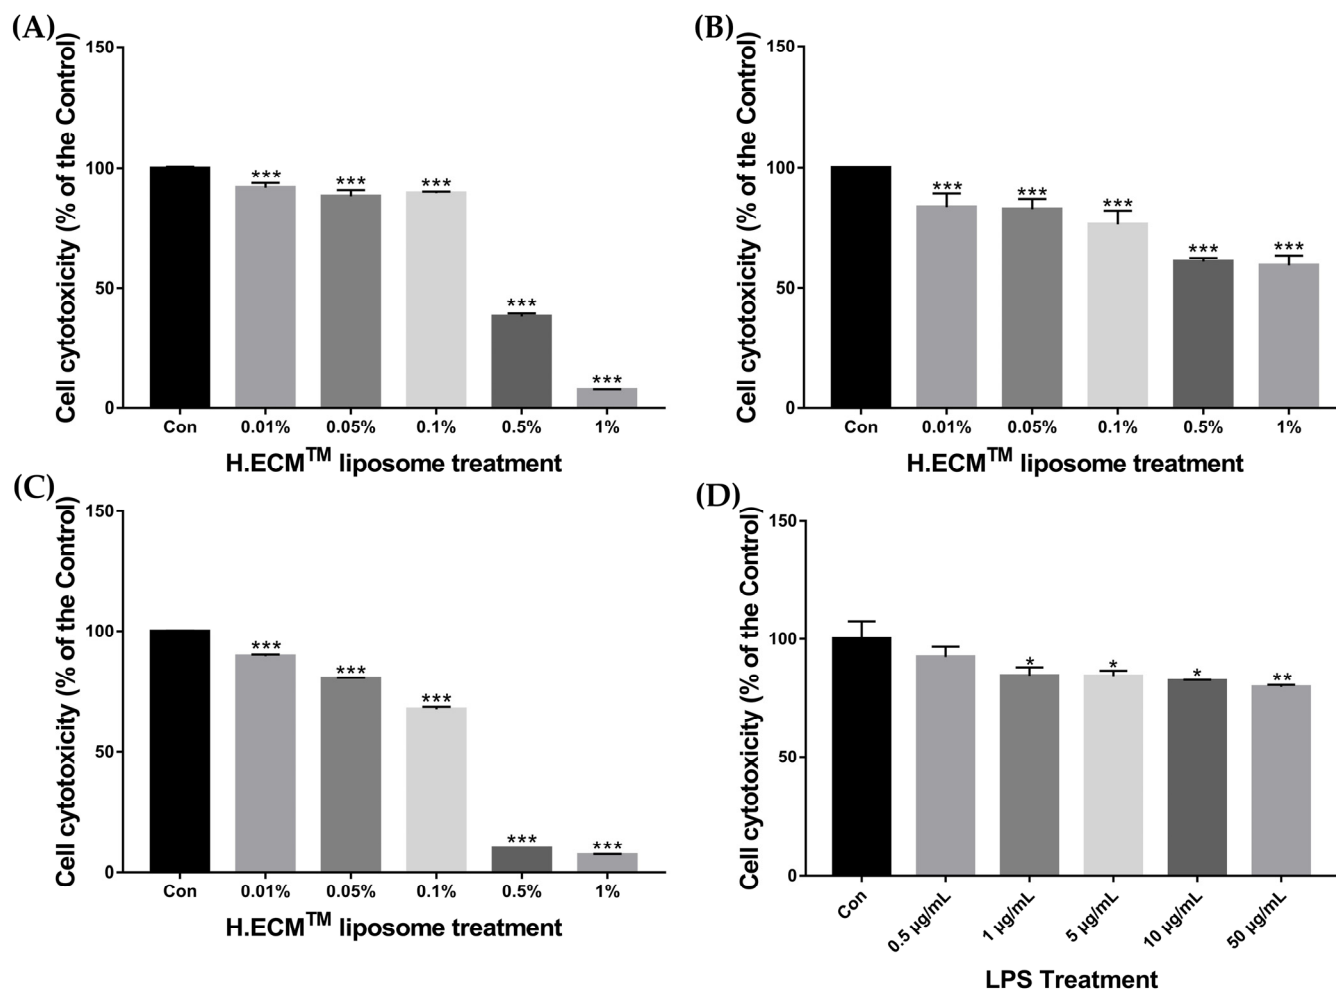

**Figure S1.** Cell cytotoxicity of H.ECM™ liposome and LPS depending on concentration. Concentration-dependent cell cytotoxicity of H.ECM™ liposome was confirmed on RAW264.7 cells (A), KC cells (B) and HDF cells (C). Concentration-dependent cell cytotoxicity of LPS was confirmed on HDF cells (D). (\*p < 0.05, \*\* p < 0.01, \*\*\* p < 0.005).

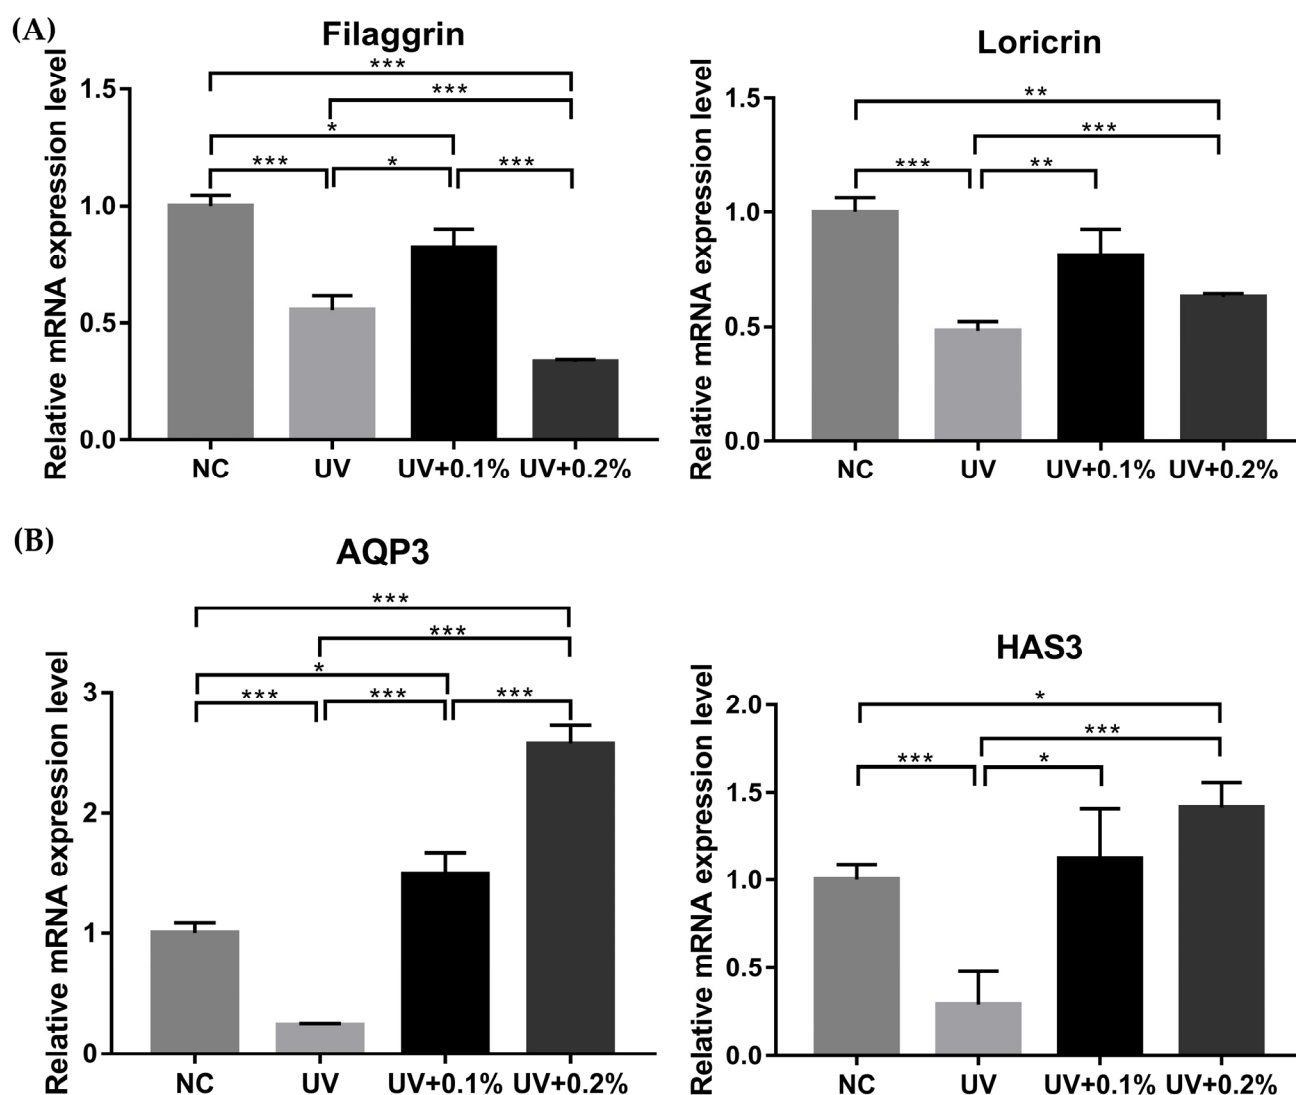

**Figure S2.** Expression levels of filaggrin, loricrin (A), HAS3 and AQP3 (B) gene with un-treatment at tissue specimen (negative control), only UVB irradiation (UV), 0.1% (UV+0.1%) and 0.2% (UV+0.2%) H.ECM™ liposome treatment at UVB-irradiated tissue specimen. (\* $p < 0.05$ , \*\* $p < 0.01$ , \*\*\* $p < 0.005$ ).
